# Supplementary material for: Effects of the nanowire length on large second-order nonlinear optical responses: a theoretical investigation of the thinnest doped beryllium nanowires with IR and UV working wavebands
Source: Royal Society of Chemistry journal article supplement (doi:10.1039/d1dt00013f), 2021-01-01
Supplement: d1dt00013f1.pdf [file d1dt00013f1.pdf]

# **Effects of the Nanowire Length on Large Second Order Nonlinear Optical Response: A Theoretical Investigation of the Thinnest Doped Beryllium Nanowires with IR and UV Working Wavebands**

Jing Li,<sup>a</sup> Weihong Chen,<sup>a</sup> Jiayuan Liu,<sup>b</sup> Weiming Sun,<sup>c</sup> Zhiru Li\*<sup>a</sup> and Ying Li\*<sup>a</sup>

<sup>a</sup> *Laboratory of Theoretical and Computational Chemistry, Institute of Theoretical Chemistry, College of Chemistry, Jilin University, Changchun, 130023, China*

<sup>b</sup> *Institute of Applied Chemistry, Hebei North University, Zhangjiakou, 075000, China*

<sup>c</sup> *Department of Basic Chemistry, The School of Pharmacy, Fujian Medical University, Fuzhou, 350108, China*

Table S1. The static first hyperpolarizability ( $\beta_0^e$ ) of  $\text{Ca}(\text{Be}_6)_n\text{Mg}$  ( $n=2,3$ ) calculated by different methods and the same basis 6-311+G(d).

| $\beta_0^e$      | $\text{Ca}(\text{Be}_6)_2\text{Mg}$  | $\text{Ca}(\text{Be}_6)_3\text{Mg}$  |
|------------------|--------------------------------------|--------------------------------------|
| MP2              | $1.45 \times 10^4$                   | $4.61 \times 10^4$                   |
| B3LYP            | $1.90 \times 10^4$                   | $2.16 \times 10^4$                   |
| CAM-B3LYP        | $1.93 \times 10^4$                   | $2.60 \times 10^4$                   |
| <b>BHandHLYP</b> | <b><math>1.82 \times 10^4</math></b> | <b><math>2.67 \times 10^4</math></b> |
| M06-2X           | $2.44 \times 10^4$                   | $9.33 \times 10^3$                   |

Table S2. The static first hyperpolarizability ( $\beta_0^e$ ) of  $\text{Ca}(\text{Be}_6)_n\text{Mg}$  ( $n=2,3$ ) calculated by the same BHandHLYP method and different basis sets.

| $\beta_0^e$       | $\text{Ca}(\text{Be}_6)_2\text{Mg}$  | $\text{Ca}(\text{Be}_6)_3\text{Mg}$  |
|-------------------|--------------------------------------|--------------------------------------|
| 6-31+G            | $1.34 \times 10^4$                   | $2.05 \times 10^4$                   |
| 6-31+G(d)         | $1.56 \times 10^4$                   | $2.33 \times 10^4$                   |
| 6-31+G(d,p)       | $1.56 \times 10^4$                   | $2.33 \times 10^4$                   |
| 6-31++G(d,p)      | $1.56 \times 10^4$                   | $2.33 \times 10^4$                   |
| <b>6-311+G(d)</b> | <b><math>1.82 \times 10^4</math></b> | <b><math>2.67 \times 10^4</math></b> |
| 6-311+G(d,p)      | $1.82 \times 10^4$                   | $2.67 \times 10^4$                   |
| 6-311++G(d,p)     | $1.82 \times 10^4$                   | $2.67 \times 10^4$                   |
| 6-311++G(2d,2p)   | $1.82 \times 10^4$                   | $2.67 \times 10^4$                   |
| 6-311++G(2df,2pd) | $1.85 \times 10^4$                   | $2.73 \times 10^4$                   |

Table S3. The valences (V), Static Electronic First Hyperpolarizability  $\beta_0^e$  (au), Electronic spatial extent  $\langle R^2 \rangle$  (au) and Polarizability  $\alpha^e$  (au).

| Systems                              | V  | $\beta_0^e$            | $\langle R^2 \rangle$ | $\alpha^e$           |
|--------------------------------------|----|------------------------|-----------------------|----------------------|
| (Be <sub>6</sub> ) <sub>4</sub>      | 0  | 0.0019×10 <sup>4</sup> | 5.78×10 <sup>3</sup>  | 8.15×10 <sup>2</sup> |
| Li(Be <sub>6</sub> ) <sub>4</sub>    | -1 | 2.45×10 <sup>4</sup>   | 6.40×10 <sup>3</sup>  | 8.59×10 <sup>2</sup> |
| Mg(Be <sub>6</sub> ) <sub>4</sub>    | -2 | 1.73×10 <sup>4</sup>   | 8.22×10 <sup>3</sup>  | 9.84×10 <sup>2</sup> |
| Li(Be <sub>6</sub> ) <sub>4</sub> Mg | -3 | 1.71×10 <sup>4</sup>   | 9.06×10 <sup>3</sup>  | 9.91×10 <sup>2</sup> |
| Na(Be <sub>6</sub> ) <sub>4</sub> Mg | -3 | 2.64×10 <sup>4</sup>   | 11.1×10 <sup>3</sup>  | 10.3×10 <sup>2</sup> |
| Ca(Be <sub>6</sub> ) <sub>4</sub> Mg | -4 | 3.98×10 <sup>4</sup>   | 13.4×10 <sup>3</sup>  | 15.3×10 <sup>2</sup> |

The electronic spatial extent  $\langle R^2 \rangle$  is a physical property which characterizes the electron density volume around the molecule.<sup>66</sup>

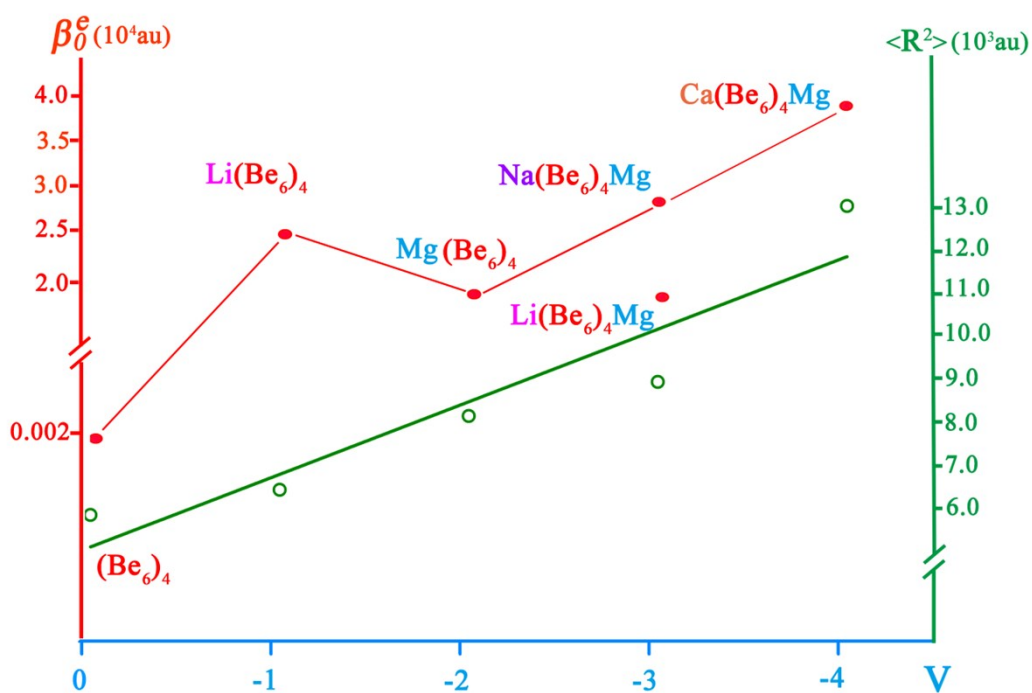

Figure S1. The V value dependences on  $\beta_0^e$  and  $\langle R^2 \rangle$ .

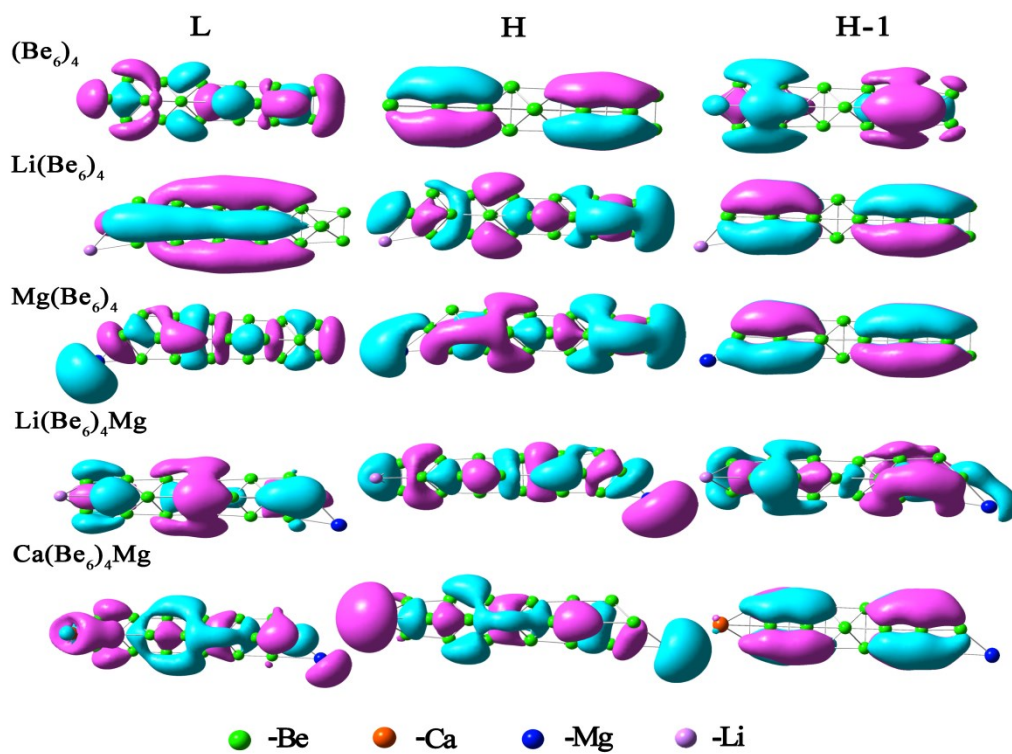

Figure S2. Frontier orbitals and occupied orbitals of for  $(\text{Be}_6)_4$  chains and corresponding doped  $\text{Li}(\text{Be}_6)_4$ ,  $\text{Mg}(\text{Be}_6)_4$ ,  $\text{Li}(\text{Be}_6)_4\text{Mg}$  and  $\text{Ca}(\text{Be}_6)_4\text{Mg}$ .
